# Supplementary material
Source: MDPI journal article supplement (https://www.mdpi.com/2073-4352/14/5/396)
Supplement: s1 [file s1]

## Supplementary Information

# Two 5-methoxyindole carboxylic acid-derived hydrazones of neuropharmacological interest: synthesis, crystal structure, and chemiluminescent study of radical scavenging properties

Neda Anastassova <sup>1,2</sup>, Nadya Hristova-Avakumova <sup>3</sup>, Rusi Rusev <sup>4</sup>, Boris Shivachev <sup>4</sup>, Denitsa Yancheva <sup>1,2,\*</sup>

<sup>1</sup> Institute of Organic Chemistry with Centre of Phytochemistry, Bulgarian Academy of Sciences, Acad. G. Bonchev Str., Building 9, 1113 Sofia, Bulgaria; neda.anastassova@orgchm.bas.bg, denitsa.pantaleeva@orgchm.bas.bg

<sup>2</sup> University of Chemical Technology and Metallurgy, Department of Organic Chemistry, 8 Kliment Ohridski Blvd., 1756 Sofia, Bulgaria;

<sup>3</sup> Department of Medical Physics and Biophysics, Faculty of Medicine, Medical University of Sofia, 2 Zdrave Str., 1431 Sofia, Bulgaria; nhrstova@medfac.mu-sofia.bg (N.A.H.)

<sup>4</sup> Acad. Ivan Kostov Institute of Mineralogy and Crystallography, Bulgarian Academy of Sciences, Department of Structural Crystallography and Materials Science, Acad G. Bonchev Str., build. 107, 1113 Sofia, Bulgaria; r.rusev93@gmail.com (R.R.); : blshivachev@gmail.com (B.S.)

\* Correspondence: denitsa.pantaleeva@orgchm.bas.bg (D.Y.);

## Contents

|                                                                                                                   |       |
|-------------------------------------------------------------------------------------------------------------------|-------|
| <b>Figure S1.</b> ATR-FTIR spectrum of compound <b>3a</b>                                                         | p. 2  |
| <b>Figure S2.</b> ATR-FTIR spectrum of compound <b>3b</b>                                                         | p. 3  |
| <b>Figure S3.</b> NMR spectra of compound <b>3a</b> in DMSO- <i>d</i> <sub>6</sub>                                | p. 4  |
| <b>Figure S2.</b> NMR spectra of compound <b>3b</b> in DMSO- <i>d</i> <sub>6</sub>                                | p. 5  |
| <b>Figure S5a.</b> HRMS spectra of <b>3a</b> and <b>3b</b>                                                        | p. 6  |
| <b>Table S1.</b> Most important crystallographic parameters for the crystal structures of <b>3a</b> and <b>3b</b> | p. 7  |
| <b>Table S2.</b> Bond lengths for the crystal structure of <b>3a</b>                                              | p. 8  |
| <b>Table S3.</b> Bond angles for the crystal structure of <b>3a</b>                                               | p. 8  |
| <b>Table S4.</b> Bond lengths for the crystal structure of <b>3b</b>                                              | p. 9  |
| <b>Table S5.</b> Bond angles for the crystal structure of <b>3b</b>                                               | p. 10 |

**Table S6.** Interaction energies (kJ/mol) of molecule **3a** computed using single-crystal geometries. R is the distance between molecular centroids (mean atomic position) in Å. p. 11

**Table S7.** Interaction energies (kJ/mol) of molecules from **3b** computed using single-crystal geometries. R is the distance between molecular centroids (mean atomic position) in Å. p. 12

**Figure S3.** HOMO/LUMO representation for **3a**. p. 13

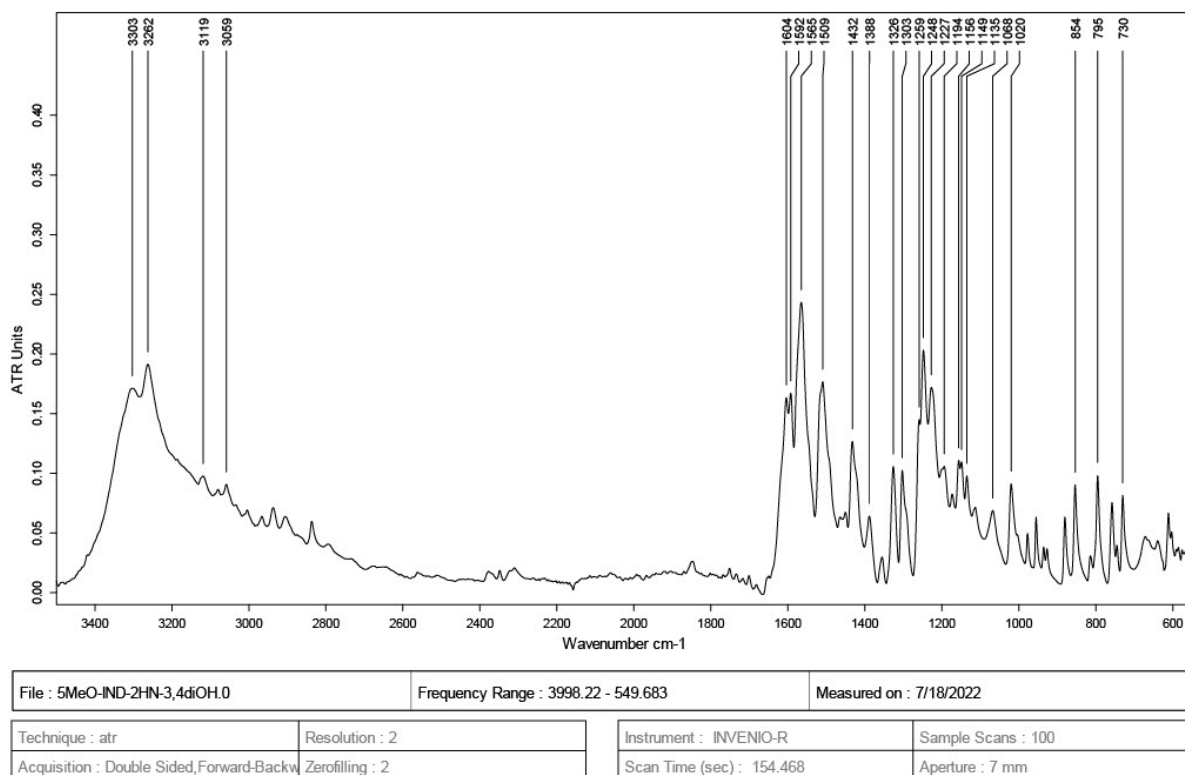

**Figure S1.** ATR-FTIR spectrum of compound **3a**

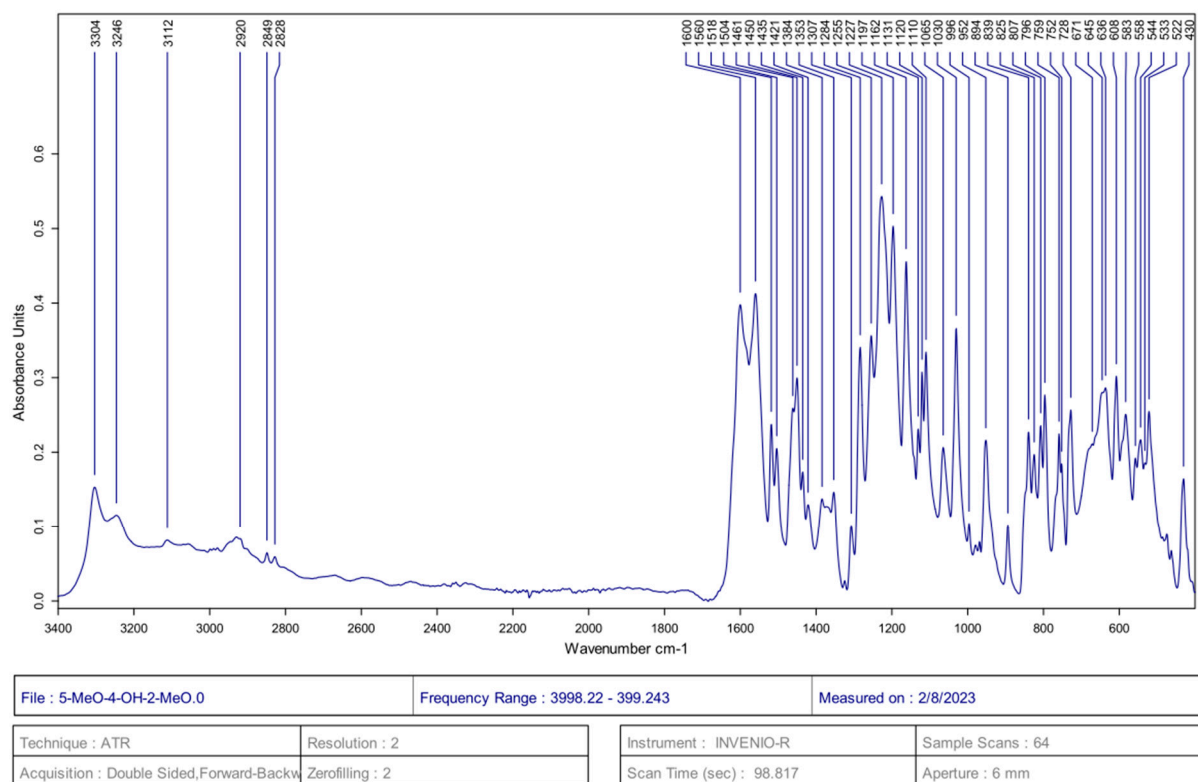

**Figure S2a.** ATR-FTIR spectrum of compound **3b**

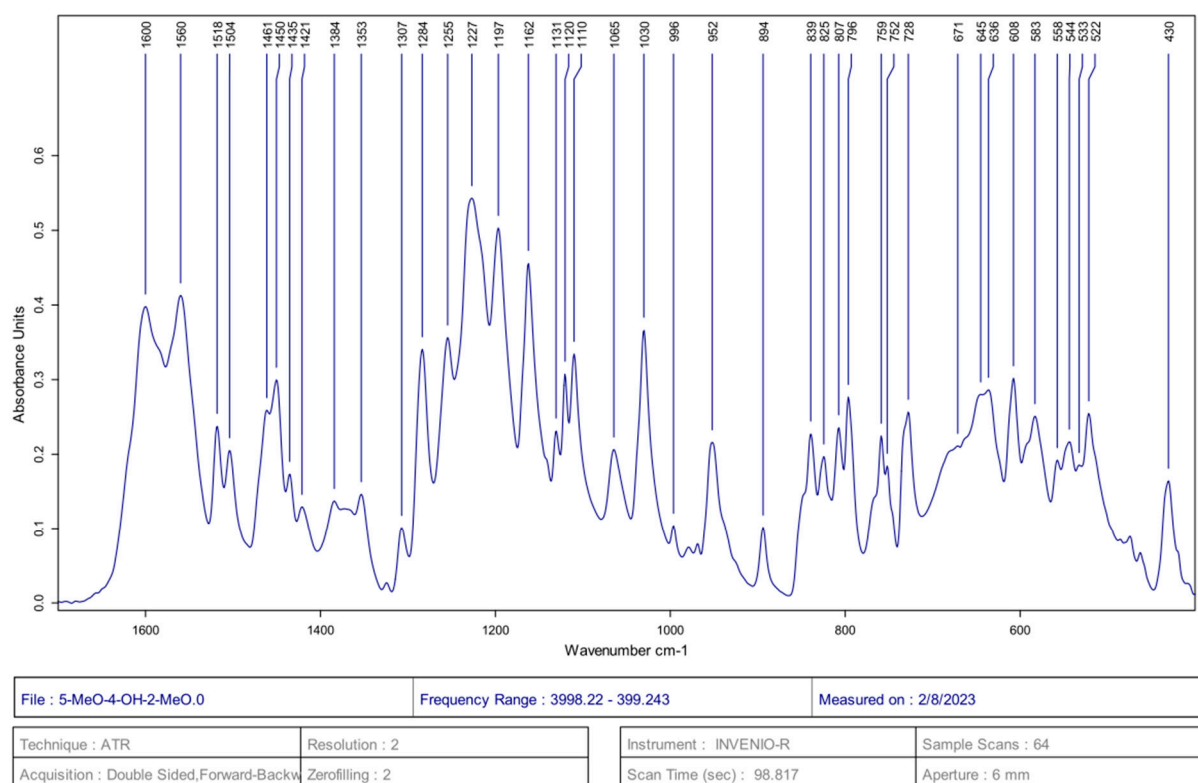

**Figure S2b.** ATR-FTIR spectrum of compound **3b**



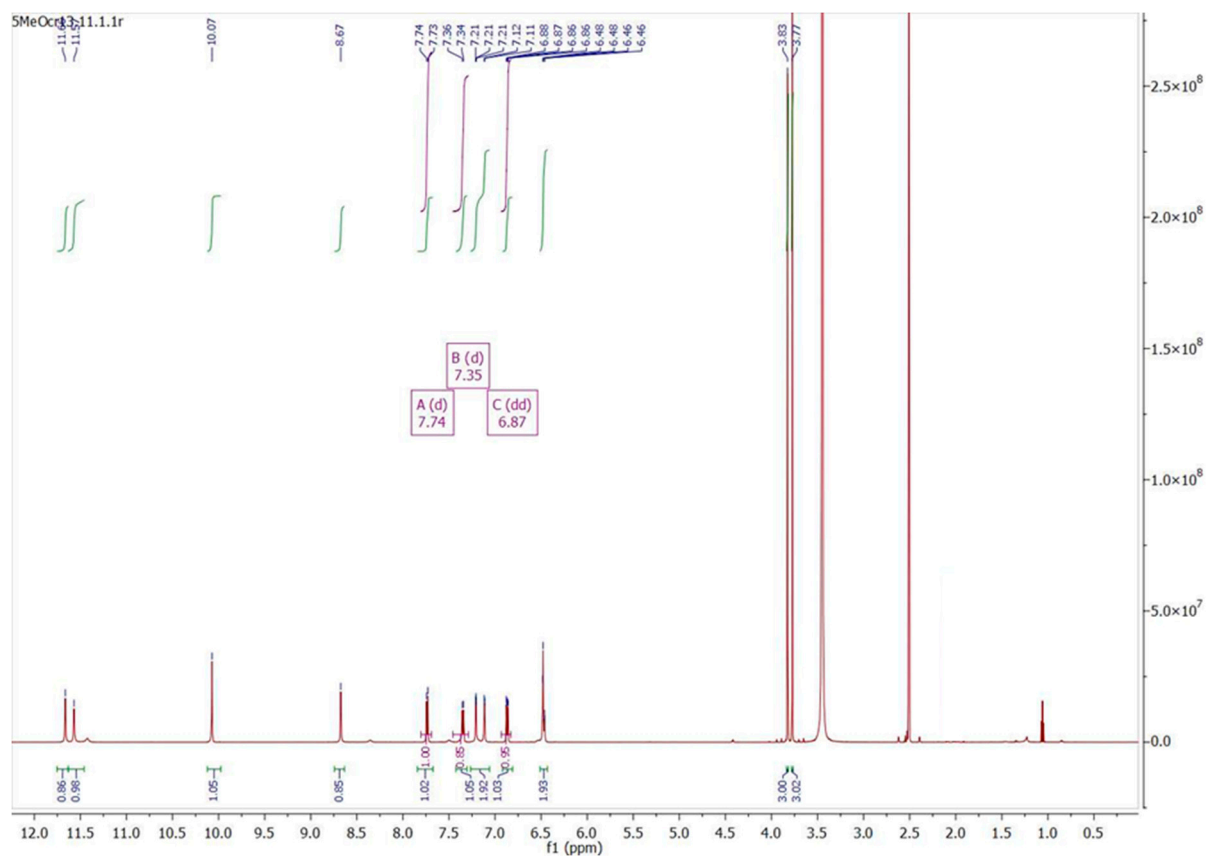

**Figure S4a.**  $^1\text{H}$ -NMR spectrum of compound **3b** in  $\text{DMSO}-d_6$

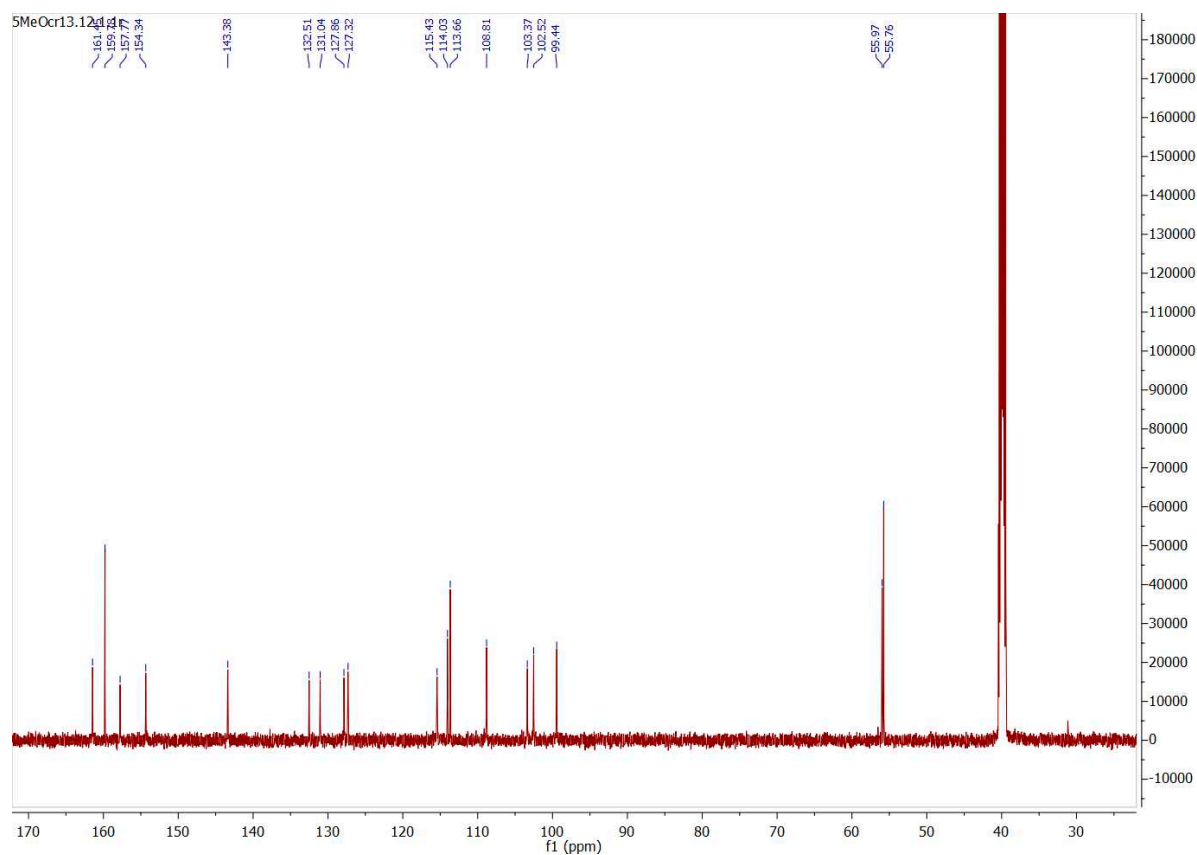

**Figure S4b.**  $^{13}\text{C}$ -NMR spectrum of compound **3b** in  $\text{DMSO}-d_6$

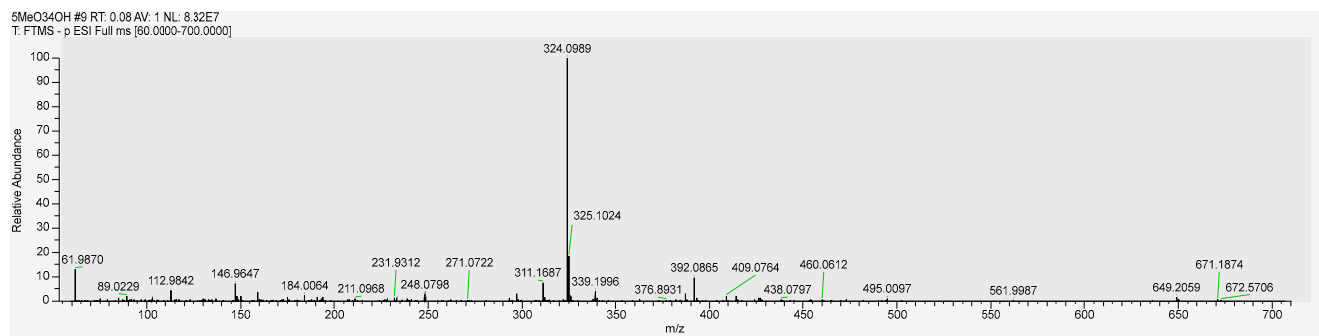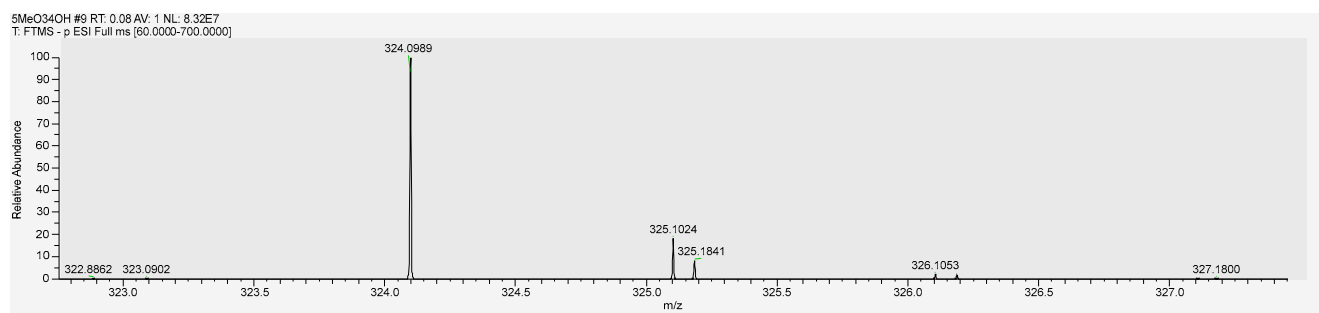

**Figure S5a. HRMS spectrum of 3a**

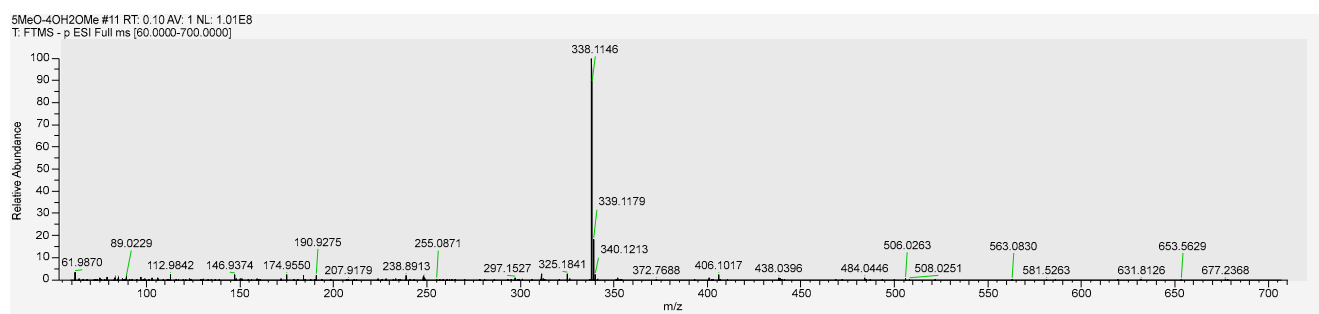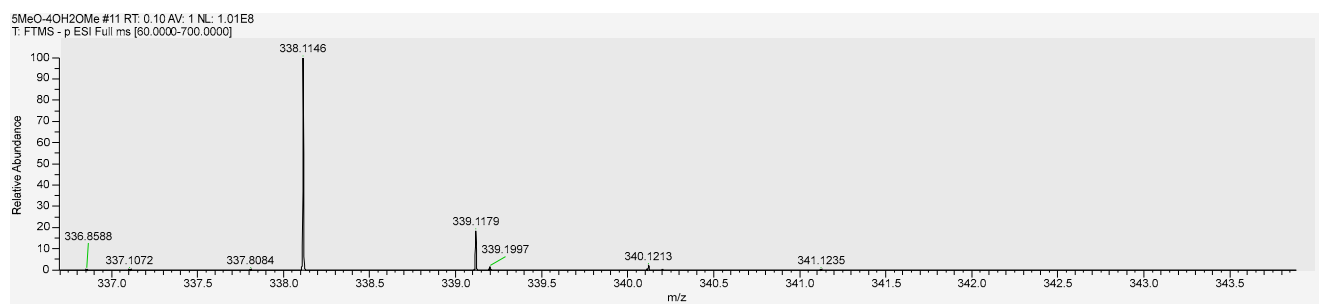

**Figure S5b. HRMS spectrum of 3b**

**Table S1.** Most important crystallographic parameters for the crystal structures of **3a** and **3b**

| Compound                                                     | <b>3a</b>                                                          | <b>3b</b>                                                          |
|--------------------------------------------------------------|--------------------------------------------------------------------|--------------------------------------------------------------------|
| Empirical formula                                            | C <sub>17</sub> H <sub>15</sub> N <sub>3</sub> O <sub>4</sub>      | C <sub>18</sub> H <sub>17</sub> N <sub>3</sub> O <sub>4</sub>      |
| Formula weight                                               | 325.32                                                             | 339.34                                                             |
| Temperature/K                                                | 290                                                                | 290                                                                |
| Crystal system                                               | Monoclinic                                                         | Triclinic                                                          |
| Space group                                                  | <i>P</i> 2 <sub>1</sub> / <i>c</i>                                 | <i>P</i> -1                                                        |
| <i>a</i> /Å                                                  | 11.2319(3)                                                         | 6.6305(17)                                                         |
| <i>b</i> /Å                                                  | 8.6743(3)                                                          | 11.155(3)                                                          |
| <i>c</i> /Å                                                  | 15.4783(5)                                                         | 23.660(5)                                                          |
| $\alpha$ /°                                                  | 90                                                                 | 83.663(8)                                                          |
| $\beta$ /°                                                   | 96.478(2)                                                          | 82.762(8)                                                          |
| $\gamma$ /°                                                  | 90                                                                 | 89.536(9)                                                          |
| Volume/Å <sup>3</sup>                                        | 1498.40(8)                                                         | 1725.3(7)                                                          |
| <i>Z</i>                                                     | 4                                                                  | 4                                                                  |
| $\rho_{\text{calc}}$ /cm <sup>3</sup>                        | 1.442                                                              | 1.306                                                              |
| $\mu$ /mm <sup>-1</sup>                                      | 0.105                                                              | 0.094                                                              |
| <i>F</i> (000)                                               | 680.0                                                              | 712.0                                                              |
| Crystal size/mm <sup>3</sup>                                 | 0.3×0.3×0.2                                                        | 0.25×0.2×0.2                                                       |
| Radiation                                                    | MoK $\alpha$<br>$\lambda$ = 0.71073                                | MoK $\alpha$<br>$\lambda$ = 0.71073                                |
| 2 $\Theta$ range for data collection/°                       | 5.298 to 52.792                                                    | 4.238 to 52.044                                                    |
| Reflections collected/independent                            | 52591/3059                                                         | 80072/6786                                                         |
| <i>R</i> <sub>int</sub> / <i>R</i> <sub>sigma</sub>          | 0.1290/0.0323                                                      | 0.0980/0.0410                                                      |
| Data/restraints/parameters                                   | 3059/0/235                                                         | 6786/0/480                                                         |
| Goodness-of-fit on <i>F</i> <sup>2</sup>                     | 1.036                                                              | 1.041                                                              |
| Final <i>R</i> indexes [ <i>I</i> ≥ 2 $\sigma$ ( <i>I</i> )] | <i>R</i> <sub>1</sub> = 0.0446,<br><i>wR</i> <sub>2</sub> = 0.1041 | <i>R</i> <sub>1</sub> = 0.0476,<br><i>wR</i> <sub>2</sub> = 0.1049 |
| Final <i>R</i> indexes [all data]                            | <i>R</i> <sub>1</sub> = 0.0669,<br><i>wR</i> <sub>2</sub> = 0.1175 | <i>R</i> <sub>1</sub> = 0.0805,<br><i>wR</i> <sub>2</sub> = 0.1219 |
| Largest diff. peak/hole / e Å <sup>-3</sup>                  | 0.23/-0.18                                                         | 0.25/-0.19                                                         |
| CCDC                                                         | 2342743                                                            | 2342744                                                            |

**Table S2.** Bond lengths for the crystal structure of **3a**

| Atom | Atom | Length/Å | Atom | Atom | Length/Å |
|------|------|----------|------|------|----------|
| O10  | C6   | 1.391(2) | C4   | C5   | 1.410(3) |
| O10  | C11  | 1.390(3) | C4   | C9   | 1.408(3) |
| O13  | C12  | 1.243(2) | C5   | C6   | 1.370(3) |
| O23  | C20  | 1.363(2) | C6   | C7   | 1.402(3) |
| O24  | C19  | 1.366(2) | C7   | C8   | 1.372(3) |
| N1   | C2   | 1.371(2) | C8   | C9   | 1.388(3) |
| N1   | C9   | 1.371(2) | C16  | C17  | 1.452(3) |
| N14  | N15  | 1.380(2) | C17  | C18  | 1.392(3) |
| N14  | C12  | 1.340(3) | C17  | C22  | 1.390(3) |
| N15  | C16  | 1.278(3) | C18  | C19  | 1.374(3) |
| C2   | C3   | 1.365(3) | C19  | C20  | 1.396(3) |
| C2   | C12  | 1.462(3) | C20  | C21  | 1.381(3) |
| C3   | C4   | 1.416(3) | C21  | C22  | 1.384(3) |

**Table S3.** Bond angles for the crystal structure of **3a**

| Atom | Atom | Atom | Angle/°    | Atom | Atom | Atom | Angle/°    |
|------|------|------|------------|------|------|------|------------|
| C11  | O10  | C6   | 117.21(18) | N1   | C9   | C8   | 130.68(18) |
| C9   | N1   | C2   | 108.69(16) | C8   | C9   | C4   | 121.77(17) |
| C12  | N14  | N15  | 119.05(16) | O13  | C12  | N14  | 122.93(17) |
| C16  | N15  | N14  | 115.57(16) | O13  | C12  | C2   | 120.46(18) |
| N1   | C2   | C12  | 117.12(16) | N14  | C12  | C2   | 116.61(16) |
| C3   | C2   | N1   | 109.71(16) | N15  | C16  | C17  | 121.72(18) |
| C3   | C2   | C12  | 133.15(18) | C18  | C17  | C16  | 121.61(18) |
| C2   | C3   | C4   | 106.99(17) | C22  | C17  | C16  | 120.04(17) |
| C5   | C4   | C3   | 133.87(19) | C22  | C17  | C18  | 118.35(17) |
| C9   | C4   | C3   | 107.05(16) | C19  | C18  | C17  | 121.11(18) |
| C9   | C4   | C5   | 119.07(18) | O24  | C19  | C18  | 117.45(17) |
| C6   | C5   | C4   | 118.55(19) | O24  | C19  | C20  | 122.45(17) |
| O10  | C6   | C7   | 121.73(19) | C18  | C19  | C20  | 120.10(17) |
| C5   | C6   | O10  | 116.85(19) | O23  | C20  | C19  | 123.36(17) |
| C5   | C6   | C7   | 121.41(18) | O23  | C20  | C21  | 117.43(18) |
| C8   | C7   | C6   | 121.07(19) | C21  | C20  | C19  | 119.20(17) |
| C7   | C8   | C9   | 118.1(2)   | C20  | C21  | C22  | 120.40(19) |



| Atom | Atom | Atom | Angle/°    | Atom | Atom | Atom | Angle/°    |
|------|------|------|------------|------|------|------|------------|
| N1   | C9   | C4   | 107.55(16) | C21  | C22  | C17  | 120.76(18) |

**Table S4.** Bond lengths for the crystal structure of **3b**

| Atom | Atom | Length/Å | Atom | Atom | Length/Å |
|------|------|----------|------|------|----------|
| O131 | C121 | 1.242(2) | C171 | C181 | 1.390(3) |
| O132 | C122 | 1.248(2) | C201 | C211 | 1.383(3) |
| O231 | C201 | 1.370(2) | C201 | C191 | 1.383(3) |
| O232 | C202 | 1.367(2) | C211 | C221 | 1.382(3) |
| N141 | N151 | 1.385(2) | C21  | C31  | 1.370(3) |
| N141 | C121 | 1.342(2) | C22  | C122 | 1.459(3) |
| N11  | C91  | 1.372(2) | C22  | C32  | 1.380(3) |
| N11  | C21  | 1.374(2) | C41  | C31  | 1.417(3) |
| O241 | C221 | 1.365(2) | C41  | C51  | 1.400(3) |
| O241 | C251 | 1.410(3) | C32  | C42  | 1.417(3) |
| N151 | C161 | 1.283(2) | C51  | C61  | 1.367(3) |
| N142 | N152 | 1.384(2) | C202 | C212 | 1.378(3) |
| N142 | C122 | 1.339(2) | C202 | C192 | 1.378(3) |
| N12  | C22  | 1.375(2) | C92  | C42  | 1.400(3) |
| N12  | C92  | 1.371(3) | C92  | C82  | 1.396(3) |
| O102 | C62  | 1.381(3) | C81  | C71  | 1.380(3) |
| O102 | C112 | 1.408(3) | C222 | C172 | 1.395(3) |
| N152 | C162 | 1.276(2) | C222 | C212 | 1.384(3) |
| O242 | C222 | 1.368(2) | C172 | C162 | 1.449(3) |
| O242 | C252 | 1.419(3) | C172 | C182 | 1.390(3) |
| C121 | C21  | 1.460(3) | C42  | C52  | 1.413(3) |
| O101 | C61  | 1.373(3) | C181 | C191 | 1.376(3) |
| O101 | C111 | 1.401(3) | C61  | C71  | 1.405(3) |
| C91  | C41  | 1.408(3) | C52  | C62  | 1.367(3) |
| C91  | C81  | 1.389(3) | C82  | C72  | 1.366(3) |
| C171 | C161 | 1.456(3) | C182 | C192 | 1.375(3) |
| C171 | C221 | 1.401(3) | C62  | C72  | 1.407(3) |

**Table S5.** Bond angles for the crystal structure of **3b**

| Atom | Atom | Atom | Angle/°    | Atom | Atom | Atom | Angle/°    |
|------|------|------|------------|------|------|------|------------|
| C121 | N141 | N151 | 119.74(17) | C22  | C32  | C42  | 107.15(17) |
| C91  | N11  | C21  | 108.68(17) | C61  | C51  | C41  | 119.0(2)   |
| C221 | O241 | C251 | 119.70(17) | O241 | C221 | C171 | 114.46(17) |
| C161 | N151 | N141 | 113.42(16) | O241 | C221 | C211 | 124.35(18) |
| C122 | N142 | N152 | 119.03(17) | C211 | C221 | C171 | 121.18(18) |
| C92  | N12  | C22  | 108.72(17) | O232 | C202 | C212 | 121.21(18) |
| C62  | O102 | C112 | 118.2(2)   | O232 | C202 | C192 | 118.36(18) |
| C162 | N152 | N142 | 114.73(17) | C212 | C202 | C192 | 120.42(19) |
| C222 | O242 | C252 | 118.21(18) | N12  | C92  | C42  | 108.22(17) |
| O131 | C121 | N141 | 122.26(18) | N12  | C92  | C82  | 129.8(2)   |
| O131 | C121 | C21  | 121.82(17) | C82  | C92  | C42  | 121.9(2)   |
| N141 | C121 | C21  | 115.85(17) | C71  | C81  | C91  | 117.7(2)   |
| C61  | O101 | C111 | 119.3(2)   | O242 | C222 | C172 | 115.66(18) |
| N11  | C91  | C41  | 108.03(16) | O242 | C222 | C212 | 123.44(18) |
| N11  | C91  | C81  | 130.12(19) | C212 | C222 | C172 | 120.88(19) |
| C81  | C91  | C41  | 121.83(19) | C222 | C172 | C162 | 120.05(19) |
| C221 | C171 | C161 | 118.78(18) | C182 | C172 | C222 | 117.46(18) |
| C181 | C171 | C161 | 122.81(18) | C182 | C172 | C162 | 122.48(18) |
| C181 | C171 | C221 | 118.08(18) | C92  | C42  | C32  | 106.93(18) |
| N151 | C161 | C171 | 122.06(18) | C92  | C42  | C52  | 119.50(19) |
| O231 | C201 | C211 | 121.70(18) | C52  | C42  | C32  | 133.56(19) |
| O231 | C201 | C191 | 117.25(18) | C191 | C181 | C171 | 121.32(19) |
| C191 | C201 | C211 | 121.05(18) | C202 | C212 | C222 | 119.91(19) |
| C221 | C211 | C201 | 118.99(18) | O101 | C61  | C71  | 123.5(2)   |
| N11  | C21  | C121 | 118.69(17) | C51  | C61  | O101 | 115.4(2)   |
| C31  | C21  | N11  | 109.20(17) | C51  | C61  | C71  | 121.1(2)   |
| C31  | C21  | C121 | 131.95(17) | N152 | C162 | C172 | 120.83(19) |
| N12  | C22  | C122 | 117.39(17) | C181 | C191 | C201 | 119.36(19) |
| N12  | C22  | C32  | 108.97(17) | C81  | C71  | C61  | 121.1(2)   |
| C32  | C22  | C122 | 133.58(18) | C62  | C52  | C42  | 118.3(2)   |
| C91  | C41  | C31  | 106.56(17) | C72  | C82  | C92  | 117.2(2)   |
| C51  | C41  | C91  | 119.23(18) | C192 | C182 | C172 | 122.2(2)   |
| C51  | C41  | C31  | 134.19(19) | C182 | C192 | C202 | 119.2(2)   |

| Atom | Atom | Atom | Angle/°    | Atom | Atom | Atom | Angle/°  |
|------|------|------|------------|------|------|------|----------|
| O132 | C122 | N142 | 121.85(18) | O102 | C62  | C72  | 113.9(2) |
| O132 | C122 | C22  | 121.12(17) | C52  | C62  | O102 | 125.0(2) |
| N142 | C122 | C22  | 117.01(17) | C52  | C62  | C72  | 121.0(2) |
| C21  | C31  | C41  | 107.50(17) | C82  | C72  | C62  | 122.0(2) |

**Table S6.** Interaction energies (kJ/mol) of molecule **3a** computed using single-crystal geometries. R is the distance between molecular centroids (mean atomic position) in Å.

|  | N | Symmetry operation | R     | $E_{ele}$ | $E_{pol}$ | $E_{dis}$ | $E_{rep}$ | $E_{tot}$ |
|--|---|--------------------|-------|-----------|-----------|-----------|-----------|-----------|
|  | 0 | -x, y+1/2, -z+1/2  | 10.73 | -103.0    | -27.7     | -23.8     | 114.4     | -79.5     |
|  | 0 | x, -y+1/2, z+1/2   | 8.12  | -25.8     | -6.4      | -21.6     | 37.5      | -27.6     |
|  | 0 | x, -y+1/2, z+1/2   | 9.92  | -16.2     | -6.4      | -18.3     | 26.7      | -21.4     |
|  | 1 | -x, -y, -z         | 4.04  | -31.1     | -6.2      | -98.6     | 58.7      | -87.1     |

| D     | H   | A                | R     | Electron Density | Interaction Energies (kJ/mol) |           |           |           |           |
|-------|-----|------------------|-------|------------------|-------------------------------|-----------|-----------|-----------|-----------|
|       |     |                  |       |                  | $E_{ele}$                     | $E_{pol}$ | $E_{dis}$ | $E_{rep}$ | $E_{tot}$ |
| N14   | H14 | O24 <sup>1</sup> | 8.12  | B3LYP/6-31G(d,p) | -27.3                         | -4.7      | -18.8     | 23.2      | -27.6     |
| N1    | H1  | O10 <sup>2</sup> | 9.92  | B3LYP/6-31G(d,p) | -17.1                         | -4.7      | -15.9     | 16.5      | -21.3     |
| O23   | H23 | O13 <sup>3</sup> | 10.73 | B3LYP/6-31G(d,p) | -54.4                         | -10.2     | -10.4     | 35.3      | -39.7     |
| O24   | H24 | O13 <sup>3</sup> | 10.73 | B3LYP/6-31G(d,p) | -54.4                         | -10.2     | -10.4     | 35.3      | -39.7     |
| $\pi$ | ... | $\pi$            | 4.04  | B3LYP/6-31G(d,p) | -33.0                         | -4.6      | -85.9     | 35.35     | -87.1     |

Symmetry operations: <sup>1</sup>+X,1/2-Y,-1/2+Z; <sup>2</sup>+X,3/2-Y,1/2+Z; <sup>3</sup>1-X,-1/2+Y,3/2-Z

**Table S7.** Interaction energies (kJ/mol) of molecules from **3b** computed using single-crystal geometries. R is the distance between molecular centroids (mean atomic position) in Å.

|  | N | Symop      | R    | Electron Density | $E_{ele}$ | $E_{pol}$ | $E_{dis}$ | $E_{rep}$ | $E_{tot}$ |
|--|---|------------|------|------------------|-----------|-----------|-----------|-----------|-----------|
|  | 1 | -          | 9.00 | B3LYP/6-31G(d,p) | -61.2     | -15.0     | -34.3     | 87.2      | -51.8     |
|  | 1 | -          | 8.79 | B3LYP/6-31G(d,p) | -22.3     | -4.9      | -27.5     | 38.0      | -27.8     |
|  | 1 | -          | 9.44 | B3LYP/6-31G(d,p) | -56.9     | -14.8     | -34.1     | 64.8      | -60.7     |
|  | 1 | -x, -y, -z | 7.90 | B3LYP/6-31G(d,p) | -56.7     | -16.6     | -19.9     | 53.4      | -56.5     |
|  | 0 | x, y, z    | 6.63 | B3LYP/6-31G(d,p) | -10.1     | -2.3      | -22.5     | 9.2       | -26.3     |
|  | 0 | -          | 9.70 | B3LYP/6-31G(d,p) | -29.2     | -6.5      | -29.2     | 49.8      | -30.4     |

| D    | H    | A                 | R    | Electron Density | Interaction Energies (kJ/mol) |           |           |           |           |
|------|------|-------------------|------|------------------|-------------------------------|-----------|-----------|-----------|-----------|
|      |      |                   |      |                  | $E_{ele}$                     | $E_{pol}$ | $E_{dis}$ | $E_{rep}$ | $E_{tot}$ |
| O231 | H231 | O132              | 9.00 | B3LYP/6-31G(d,p) | -61.2                         | -15.0     | -34.3     | 87.2      | -51.8     |
| N141 | H141 | O232 <sup>1</sup> | 8.79 | B3LYP/6-31G(d,p) | -22.3                         | -4.9      | -27.5     | 38.0      | -27.8     |
| O232 | H232 | O131 <sup>3</sup> | 9.44 | B3LYP/6-31G(d,p) | -56.9                         | -14.8     | -34.1     | 64.8      | -60.7     |
| N11  | H11  | O131 <sup>6</sup> | 7.90 | B3LYP/6-31G(d,p) | -56.7                         | -16.6     | -19.9     | 53.4      | -56.5     |
| N142 | H142 | O231 <sup>2</sup> | 6.63 | B3LYP/6-31G(d,p) | -10.1                         | -2.3      | -22.5     | 9.2       | -26.3     |
| N12  | H12  | O132 <sup>5</sup> | 9.70 | B3LYP/6-31G(d,p) | -29.2                         | -6.5      | -29.2     | 49.8      | -30.4     |

**Symmetry operations:** <sup>1</sup>+X,1+Y,+Z; <sup>2</sup>1+X,+Y,+Z; <sup>3</sup>1+X,-1+Y,+Z; <sup>4</sup>1-X,2-Y,1-Z; <sup>5</sup>1-X,1-Y,1-Z; <sup>6</sup>-X,2-Y,2-Z

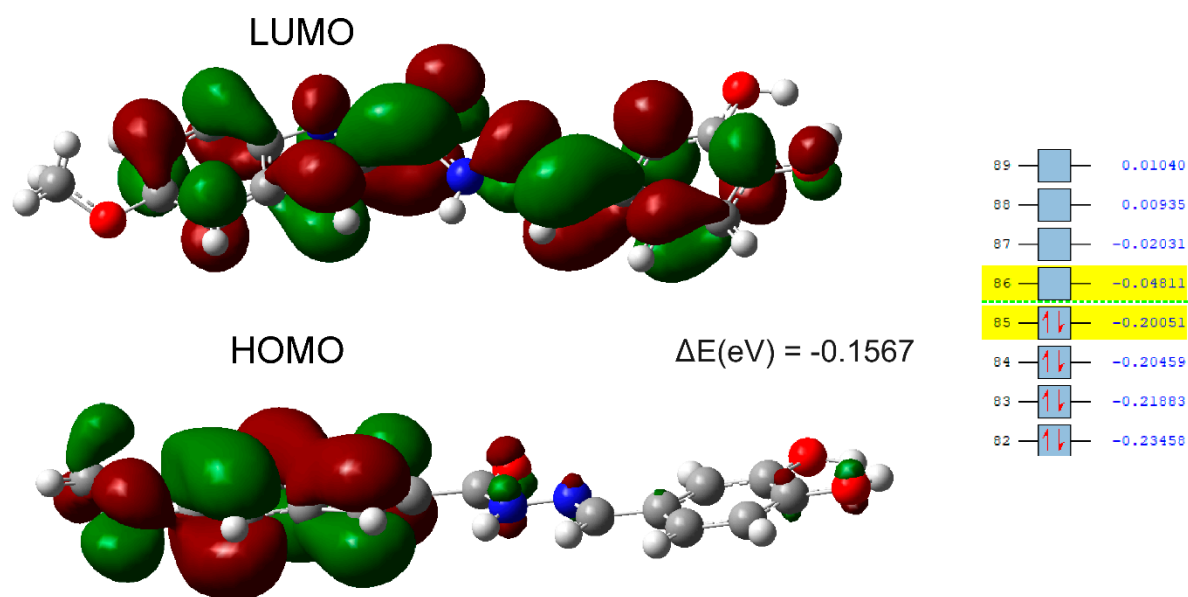

Figure S6. HOMO/LUMO representation for 3a.
